# Supplementary material for: Identification and Validation of Key Genes of Differential Correlations in Gastric Cancer
Source: Front Cell Dev Biol. 2022 Jan 13;9:801687. doi: 10.3389/fcell.2021.801687 (PMC8794754; doi:10.3389/fcell.2021.801687)
Supplement: Supplementary file 6 [file Table5.XLSX]

## Sheet: pink module
molecule_X	molecule_Y	r1	r2
MT1HL1	AKIP1	-0.622826	0.542769
FGD6	AKR1C1	-0.557168	0.515005
FGD6	MT1G	-0.775518	0.522826
FGD6	MUC6	-0.611281	0.534661
FGD6	XYLT2	-0.776022	0.569001
FGD6	FGD4	-0.740186	0.519004
AKR1C1	OGFOD1	-0.698734	0.68278
AKR1C1	AKIP1	-0.72276	0.580793
FBXL13	AKIP1	-0.524956	0.559578
PIEZO1	HHIP	-0.594623	0.57627
PIEZO1	LOC145837	-0.662094	0.503014
LOC643201	PRDM16	0.631875	-0.554211
LOC643201	GHRL	0.57745	-0.509367
DDX19A	2021-03-02	-0.686889	0.541665
DDX19A	FAM46A	-0.507279	0.524281
SULT2A1	SAE1	-0.647621	0.560445
MT1X	AKIP1	-0.523216	0.510278
ADCY3	2021-03-02	-0.574845	0.524185
MT1G	OGFOD1	-0.729613	0.538039
MT1G	AKIP1	-0.657678	0.728579
KCNJ13	AKIP1	-0.639256	0.54728
KCNJ15	SAE1	-0.646553	0.581224
KCNJ15	AKIP1	-0.663858	0.624343
ATXN7L3B	AKIP1	-0.584542	0.543335
NEDD4L	DNM1L	-0.672175	0.650808
SLC7A8	DNM1L	-0.659538	0.654043
MT1E	SAE1	-0.666895	0.519185
MT1E	AKIP1	-0.668179	0.671548
SAE1	2021-03-02	-0.666163	0.576246
SAE1	FGD4	-0.610825	0.518221
SAE1	CLIC6	-0.652505	0.538288
CWH43	COLGALT1	-0.637312	0.553542
2021-03-02	OGFOD1	-0.623546	0.559464
2021-03-02	USP31	-0.509511	0.543437
2021-03-02	AKIP1	-0.631407	0.733394
COLGALT1	HHIP	-0.539586	0.507524
KCNJ16	OGFOD1	-0.75694	0.669628
KCNJ16	AKIP1	-0.66123	0.564034
OGFOD1	PKIB	-0.733285	0.553889
OGFOD1	GHRL	-0.630939	0.603963
USP31	PKIB	-0.516052	0.508077
USP31	PRDM16	-0.526421	0.592104
USP31	GHRL	-0.525785	0.513599
USP31	CLIC6	-0.51736	0.657428
FGD4	AKIP1	-0.558608	0.51647
PELI2	AKIP1	-0.710411	0.585662
PKIB	AKIP1	-0.764188	0.554552
PRDM16	AKIP1	-0.639196	0.589383
CCKBR	AKIP1	-0.580138	0.558173
GHRL	AKIP1	-0.607633	0.546588
AKIP1	CLIC6	-0.657462	0.638047
AKIP1	FAM174B	-0.584002	0.519951

## Sheet: turquoise module
molecule_X	molecule_Y	r1	r2
PSMD2	MYBL2	-0.519352	0.510278
PSMD2	KIFC1	-0.525929	0.568282
HDGF	AHCTF1	-0.510195	0.530769
AHCY	CPNE1	-0.589979	0.585328
AHCY	AAR2	-0.528473	0.569728
AHCY	TGIF2	-0.657426	0.506189
DEK	MRPS18B	-0.522544	0.560198
RPL8	MTFR1	-0.599448	0.581696
RPL8	DDX31	-0.513075	0.504246
RPL8	ATAD2	-0.505491	0.554778
RPL8	FAM91A1	-0.589655	0.500932
TPD52L2	MYBL2	-0.612193	0.568811
TPD52L2	TOMM34	-0.515836	0.601492
TPD52L2	STAU1	-0.559544	0.630114
AHSA1	PTGS1	0.551935	-0.511149
AHSA1	PDE1C	0.513279	-0.53336
MYBL2	AAR2	-0.609553	0.57766
MYBL2	PFDN2	-0.592271	0.630566
MYBL2	SSB	-0.657462	0.517381
MYBL2	REEP5	0.56042	-0.547502
MYBL2	MRPL9	-0.531281	0.61514
TOMM34	SSB	-0.593171	0.536306
TOMM34	MRPL9	-0.519604	0.571024
TOMM34	RTFDC1	-0.541794	0.564817
CKS1B	VPS72	-0.527645	0.51641
UBAC1	DDX31	-0.502814	0.505324
PLK1	PFDN2	-0.605713	0.536775
PRPF3	IQGAP3	-0.503162	0.53815
VPS72	NUF2	-0.508707	0.525421
SHFM1	CPSF4	-0.527021	0.538989
TOPBP1	PFDN2	-0.525425	0.546425
LIG1	TIMM44	-0.518356	0.556438
UBE2C	PSMD4	-0.505155	0.573447
UBE2C	SLC25A46	0.643828	-0.500917
UBE2C	TCFL5	-0.505239	0.578973
BMS1	RAD54L	-0.506295	0.551562
BMS1	KIFC1	-0.545203	0.550516
BMS1	RAI2	0.579574	-0.550419
BMS1	MRPS12	-0.524152	0.514687
BMS1	ADH1B	0.524092	-0.512423
BMS1	FAM69A	0.586319	-0.505805
BMS1	MYO19	-0.559304	0.503615
SPAG5	PSMD4	-0.591407	0.589798
FAM50A	IRAK1	-0.587939	0.521207
EZH2	ABCF2	-0.55574	0.615804
BUB1B	TIMM44	-0.51592	0.531805
BUB1B	PSMD4	-0.508515	0.521534
CTSO	PFDN2	0.560132	-0.667339
CTSO	SSB	0.624434	-0.536874
CTSO	MRPL9	0.500066	-0.571577
CTSO	STX12	-0.577354	0.549299
TRIP13	PSMD4	-0.537474	0.537716
CDC45	TIMM44	-0.541218	0.540376
KIF11	TIMM44	-0.562484	0.551852
KIF11	ABCF2	-0.524464	0.538535
RAD54L	PFDN2	-0.524356	0.539648
RAD54L	ILKAP	-0.50237	0.537556
RAD54L	INTS2	-0.509331	0.526096
RAD54L	GEMIN5	-0.564944	0.589437
RAD54L	SSB	-0.634695	0.510283
RAD54L	MRPL9	-0.504626	0.532524
RAD54L	STX12	0.534629	-0.508869
TTK	PFDN2	-0.590843	0.593175
TTK	RIOK1	-0.506271	0.547516
TTK	PSMD4	-0.507591	0.504815
MELK	PFDN2	-0.514359	0.535237
MELK	TIMM44	-0.521656	0.505215
JADE3	STX12	0.532637	-0.511047
SLC10A3	IRAK1	-0.610981	0.551545
NR3C2	TMEM185B	0.506811	-0.511251
ACYP1	HPGDS	0.509859	-0.520716
ACYP1	PDE1C	0.516208	-0.502118
KATNA1	MTFR2	-0.507207	0.519457
FOXF2	RHOBTB1	-0.53889	0.506872
FOXF2	PSD3	-0.533069	0.501363
P2RY14	PFDN2	0.629055	-0.578515
P2RY14	FTSJ2	0.533873	-0.503656
P2RY14	TMEM185B	0.521872	-0.503458
CLEC10A	PFDN2	0.577306	-0.544846
CLEC10A	FAM20A	-0.582634	0.536587
HPGDS	PFDN2	0.628179	-0.504224
CPNE1	RPN2	-0.53517	0.5711
ITPA	AAR2	-0.531173	0.524629
ITPA	ESF1	-0.511455	0.595613
ITPA	ZNF343	-0.518332	0.582806
GTF2F2	DIAPH3	-0.534725	0.538174
KIFC1	PFDN2	-0.630039	0.599721
KIFC1	ILKAP	-0.554323	0.602094
KIFC1	RIOK1	-0.573333	0.581594
KIFC1	GEMIN5	-0.628371	0.564397
KIFC1	TAF11	-0.552523	0.507691
KIFC1	SSB	-0.628551	0.551981
KIFC1	TIMM44	-0.504158	0.510951
KIFC1	MRPL9	-0.532505	0.624332
KIFC1	STX12	0.519172	-0.536845
KIFC1	TSR1	-0.527969	0.572445
KIFC1	RSRC1	-0.582046	0.510555
KIFC1	SNRNP48	-0.52492	0.54885
SPC25	PSMD4	-0.555152	0.51556
PUF60	C16orf45	0.556028	-0.520954
PUF60	FAM91A1	-0.547327	0.567634
TPX2	AAR2	-0.543534	0.545533
TPX2	PSMD4	-0.521752	0.536863
GRB7	EXOSC2	-0.507819	0.513305
RHOBTB1	PDK4	-0.536166	0.532618
NCAPH	PFDN2	-0.501122	0.612625
NCAPH	PRPF31	-0.510495	0.526974
NCAPH	ABCF2	-0.512955	0.500941
NCAPH	PSMD4	-0.513543	0.551803
OIP5	PSMD4	-0.540642	0.500268
MEIS3P1	POLR3G	0.526517	-0.505829
BZW2	PFDN2	-0.638392	0.529473
BZW2	MALSU1	-0.562328	0.564899
AAR2	CSNK2A1	-0.560636	0.59241
TSEN34	CDC6	-0.55796	0.533239
TSEN34	CENPF	-0.52096	0.500278
TSEN34	AUNIP	-0.508359	0.513843
NIF3L1	ILKAP	-0.511887	0.533864
PFDN2	GMNN	-0.623114	0.500608
PFDN2	HJURP	-0.519616	0.634751
PFDN2	RAI2	0.667459	-0.511723
PFDN2	LOC100505501	0.573777	-0.509591
PFDN2	C1orf43	-0.527873	0.539879
PFDN2	IQGAP3	-0.517576	0.575605
PFDN2	TOX	0.565065	-0.533317
PFDN2	TROAP	-0.560552	0.64368
PFDN2	ADH1B	0.590447	-0.56228
PFDN2	HMMR	-0.531233	0.503022
PFDN2	KIF2C	-0.505731	0.628403
PFDN2	ETV4	-0.53817	0.502794
PFDN2	FCER1A	0.5167	-0.55723
PFDN2	MKI67	-0.515464	0.504051
PFDN2	YPEL5	0.632115	-0.535804
PFDN2	AUNIP	-0.535206	0.626448
PFDN2	MYO19	-0.610393	0.547421
PFDN2	CREBRF	0.553603	-0.583687
PFDN2	TXNDC15	0.524464	-0.508027
PFDN2	TICRR	-0.612673	0.566999
PFDN2	CCNB2	-0.513507	0.619459
GMNN	ILKAP	-0.532793	0.515428
GMNN	RIOK1	-0.586487	0.533131
GMNN	GEMIN5	-0.565749	0.522835
GMNN	SSB	-0.517648	0.594209
GMNN	MDC1	-0.519556	0.547223
GMNN	MRPL9	-0.518644	0.50183
GMNN	DDX20	-0.516904	0.52685
GMNN	CIRH1A	-0.512319	0.541089
KIF4A	PSMD4	-0.511191	0.50878
DARS2	PSMD4	-0.604212	0.54498
C1orf109	YPEL5	0.529541	-0.504616
HJURP	PSMD4	-0.509223	0.57055
ZNF232	FANCD2	-0.530561	0.524287
ZNF232	GEMIN4	-0.520468	0.610297
ZNF232	E2F7	-0.532121	0.50323
PBK	BRF2	-0.543486	0.563344
RAI2	INTS2	0.631011	-0.530072
RAI2	CACYBP	0.543726	-0.541944
RAI2	TIMM44	0.552043	-0.500586
RAI2	ILF3	0.584086	-0.511966
RAI2	PSMC3IP	0.526601	-0.547369
RAI2	TSR1	0.619814	-0.53411
RAI2	GMPS	0.524296	-0.521928
RAD54B	CYTH1	0.533837	-0.505957
BORA	IPO5	-0.573225	0.590459
C16orf59	TIMM44	-0.508923	0.56059
NCAPG2	ABCF2	-0.520336	0.514695
ILKAP	TICRR	-0.576958	0.513244
KIF18B	PSMD4	-0.589799	0.524329
MTFP1	TIMM44	-0.508863	0.520368
EBPL	MED4	-0.528468	0.534029
NUF2	PSMD4	-0.561812	0.631877
ANKRD39	AUNIP	-0.517384	0.525228
ANKRD39	DIAPH3	-0.572013	0.509087
SLC25A39	FBXO45	-0.537186	0.535223
C10orf11	FKBP4	0.585359	-0.503986
INTS2	MYO19	-0.615422	0.515686
RIOK1	MRPS18B	-0.529433	0.563277
SURF6	LPAR1	0.603756	-0.503536
UHRF1	TIMM44	-0.501614	0.588
GEMIN5	YDJC	-0.556724	0.585263
GEMIN5	FANCA	-0.572373	0.539263
GEMIN5	MRPS12	-0.61979	0.519681
GEMIN5	TROAP	-0.509307	0.530301
GEMIN5	CCNF	-0.535806	0.64605
GEMIN5	PTGS1	0.678344	-0.502426
GEMIN5	PDK4	0.657318	-0.548043
GEMIN5	TCF3	-0.506355	0.528101
GEMIN5	RECQL4	-0.527141	0.57182
GEMIN5	SHMT2	-0.509787	0.515766
GEMIN5	BUB1	-0.502178	0.541149
GEMIN5	WDR3	-0.557972	0.524118
GEMIN5	YPEL5	0.653261	-0.517218
GEMIN5	NOL6	-0.504194	0.500117
GEMIN5	TICRR	-0.553015	0.576685
GEMIN5	POC1A	-0.588083	0.552156
GEMIN5	MTHFD2	-0.563876	0.526127
YDJC	SSB	-0.57721	0.515243
YDJC	MRPL9	-0.54381	0.533096
YDJC	TSR1	-0.546571	0.592206
YDJC	TMEM185B	-0.52018	0.503409
SKA3	IPO5	-0.55694	0.555432
ANO5	BEX5	-0.517384	0.539357
GBGT1	MAF	-0.594287	0.529499
ACACB	PSMC3IP	0.540078	-0.52008
CASC5	GMPS	-0.505839	0.5567
DTYMK	SSB	-0.527585	0.565472
EARS2	COQ7	-0.526397	0.575749
MAF	SLC16A7	-0.640888	0.533657
MAF	TBC1D9	-0.59886	0.528825
MAF	ST3GAL6	-0.571953	0.577803
MAF	RNLS	-0.512319	0.530848
MAF	FAM20A	-0.687633	0.53706
IQGAP3	SLC16A7	0.5152	-0.504014
MAPRE1	STAU1	-0.669391	0.505468
SSB	WDR77	-0.571209	0.560096
SSB	TROAP	-0.540786	0.54618
SSB	PTGS1	0.52426	-0.501907
SSB	PDE1C	0.570585	-0.515616
SSB	TLE4	0.541842	-0.513354
SSB	DDX31	-0.52102	0.502064
SSB	AUNIP	-0.587699	0.655002
SSB	PSAT1	-0.628635	0.504588
SSB	DIAPH3	-0.666343	0.510961
SSB	TICRR	-0.587063	0.539527
SSB	MTHFD2	-0.513315	0.538545
TOP2A	PSMD4	-0.560036	0.566692
ANP32B	NCBP1	-0.506235	0.585021
CACYBP	CX3CR1	0.501026	-0.529829
CACYBP	PDE1C	0.541218	-0.513687
WDR77	DDX20	-0.526325	0.544853
IRAK1	RBMX2	-0.524584	0.534382
IRAK1	CXorf56	-0.615938	0.570865
PRPF31	MRPS12	-0.510783	0.546631
TIMM44	FANCA	-0.509211	0.50199
TIMM44	KIAA0101	-0.526937	0.505938
TIMM44	CCNA2	-0.517744	0.534292
TIMM44	YPEL5	0.529181	-0.560577
TIMM44	HELLS	-0.551791	0.54928
TIMM44	NDC1	-0.535974	0.553197
TIMM44	MTFR2	-0.534293	0.50731
TIMM44	CDCA2	-0.506955	0.571949
PDGFRA	STK3	0.515092	-0.561296
MTFR1	STK3	-0.614881	0.546682
MAD2L1	BRF2	-0.56354	0.510688
FANCA	TSR1	-0.517936	0.532496
LPAR1	ILF3	0.583642	-0.531536
LPAR1	SLC16A7	-0.648233	0.587778
FRY	PSMC3IP	0.533045	-0.537906
MRPS12	TSR1	-0.586547	0.535858
MRPL57	PROSER1	-0.560948	0.503945
TOX	TMEM185B	0.618962	-0.50501
TROAP	TMEM185B	-0.523204	0.502271
RCBTB2	PSMD4	0.550855	-0.517852
RCBTB2	MRPL9	0.510759	-0.518476
PDK4	STX12	-0.508455	0.50922
PDK4	TSR1	0.592403	-0.5423
POLR3G	MFSD12	-0.511467	0.50751
PDE1C	STK3	0.50267	-0.541721
ABCF2	HELLS	-0.546247	0.50459
CENPF	PSMD4	-0.530393	0.602658
CENPF	AHCTF1	-0.500678	0.594107
ILF3	DIAPH3	-0.558092	0.509309
ILF3	TICRR	-0.525449	0.515108
ILF3	CNTN4	0.59556	-0.558597
STAU1	TMEM185B	-0.551155	0.520772
STAU1	IFT52	-0.53763	0.513683
ADH1B	PSMC3IP	0.517492	-0.574509
ING1	DIAPH3	-0.629979	0.519341
PSMD4	KIF2C	-0.521764	0.527082
PSMD4	CCNB2	-0.510435	0.519986
PSMD4	MTFR2	-0.528077	0.532576
PSMD4	KIF14	-0.563408	0.587092
PSMD4	ESPL1	-0.559232	0.509656
SLC16A7	GEMIN4	0.554323	-0.510849
SLC16A7	CYBRD1	-0.626631	0.542114
STK3	CCNE2	-0.568137	0.568295
STK3	AZIN1	-0.504026	0.618458
MRPL9	YPEL5	0.617474	-0.512184
MRPL9	CREBRF	0.620006	-0.528375
CSNK2A1	TMEM185B	-0.514107	0.563123
STX12	FAM69A	-0.58213	0.500856
GALNT10	ATAD2	0.591551	-0.524259
PBXIP1	PSMC3IP	0.501734	-0.505118
C16orf45	TSR1	0.557636	-0.565909
C16orf45	MRPS26	0.587447	-0.564692
RECQL4	EXOSC2	-0.513015	0.625815
MLLT4	MORC2	-0.503186	0.500451
PEX5	CDCA3	-0.525785	0.545865
TSR1	CREBRF	0.540318	-0.503413
TSR1	TICRR	-0.59706	0.521983
HILPDA	RAB15	-0.529433	0.526829
WDR3	GPSM2	-0.508923	0.509258
WDR3	DDX20	-0.572013	0.558001
BRF2	CDCA2	-0.588371	0.556378
RSRC1	AUNIP	-0.550231	0.570137
RSRC1	DIAPH3	-0.550351	0.504712
CLSPN	SUPT16H	-0.548119	0.5231
YPEL5	CIRH1A	0.53637	-0.534077
MTPAP	DIAPH3	-0.585023	0.523256
AUNIP	DDX20	-0.52414	0.526555
AUNIP	MALSU1	-0.505611	0.551209
AUNIP	MED30	-0.570741	0.500172
ANKEF1	ZNF343	-0.528053	0.509457
SUGT1	DIAPH3	-0.560228	0.534405
DDX20	MTHFD2	-0.50477	0.509277
MALSU1	DIAPH3	-0.521284	0.504512
MED30	DIAPH3	-0.529301	0.529812

## Sheet: blue module
molecule_X	molecule_Y	r1	r2
RRAGA	GPR155	-0.501506	0.523834
TYRP1	FMO2	-0.520816	0.518951
PCM1	INTS9	-0.556448	0.501407
PKIA	GPR155	-0.511671	0.553708
GPR155	ABCB1	-0.678368	0.548853
